# Supplementary material for: Cooperative roles of chemical reactions and mechanical friction in chemical mechanical polishing of gallium nitride assisted by OH radicals: tight-binding quantum chemical molecular dynamics simulations
Source: Royal Society of Chemistry journal article supplement (doi:10.1039/d0cp05826b), 2021-01-01
Supplement: d0cp05826b1.pdf [file d0cp05826b1.pdf]

# Supporting Information for

## Cooperative Roles of Chemical Reactions and Mechanical Friction in Chemical Mechanical Polishing of Gallium Nitride Assisted by OH Radicals: Tight-Binding Quantum Chemical Molecular Dynamics Simulations

Kentaro Kawaguchi<sup>1,a</sup>, Yang Wang<sup>1,2,a</sup>, Jingxiang Xu<sup>1,3</sup>, Yusuke Ootani<sup>1</sup>, Yuji Higuchi<sup>1</sup>, Nobuki Ozawa<sup>1</sup>, and Momoji Kubo<sup>1,4\*</sup>

<sup>1</sup> Institute for Materials Research, Tohoku University, 2-1-1 Katahira, Aoba-ku, Sendai 980-8577, Japan

<sup>2</sup> Department of Mechanical Systems Engineering, Graduate School of Engineering, Tohoku University, 6-6-01 Aramaki-aza-aoba, Aoba-ku, Sendai 980-8579, Japan

<sup>3</sup> College of Engineering Science and Technology, Shanghai Ocean University, 999 Hucheng Ring Road, Pudong, Shanghai 201306, China

<sup>4</sup> New Industry Creation Hatchery Center, Tohoku University, 6-6-10 Aramaki-aza-aoba, Aoba-ku, Sendai 980-8579, Japan

<sup>a</sup>These authors contributed equally to this work.

\*Corresponding author.

Tel: +81-22-215-2050.

E-mail: momoji@imr.tohoku.ac.jp (M. Kubo).

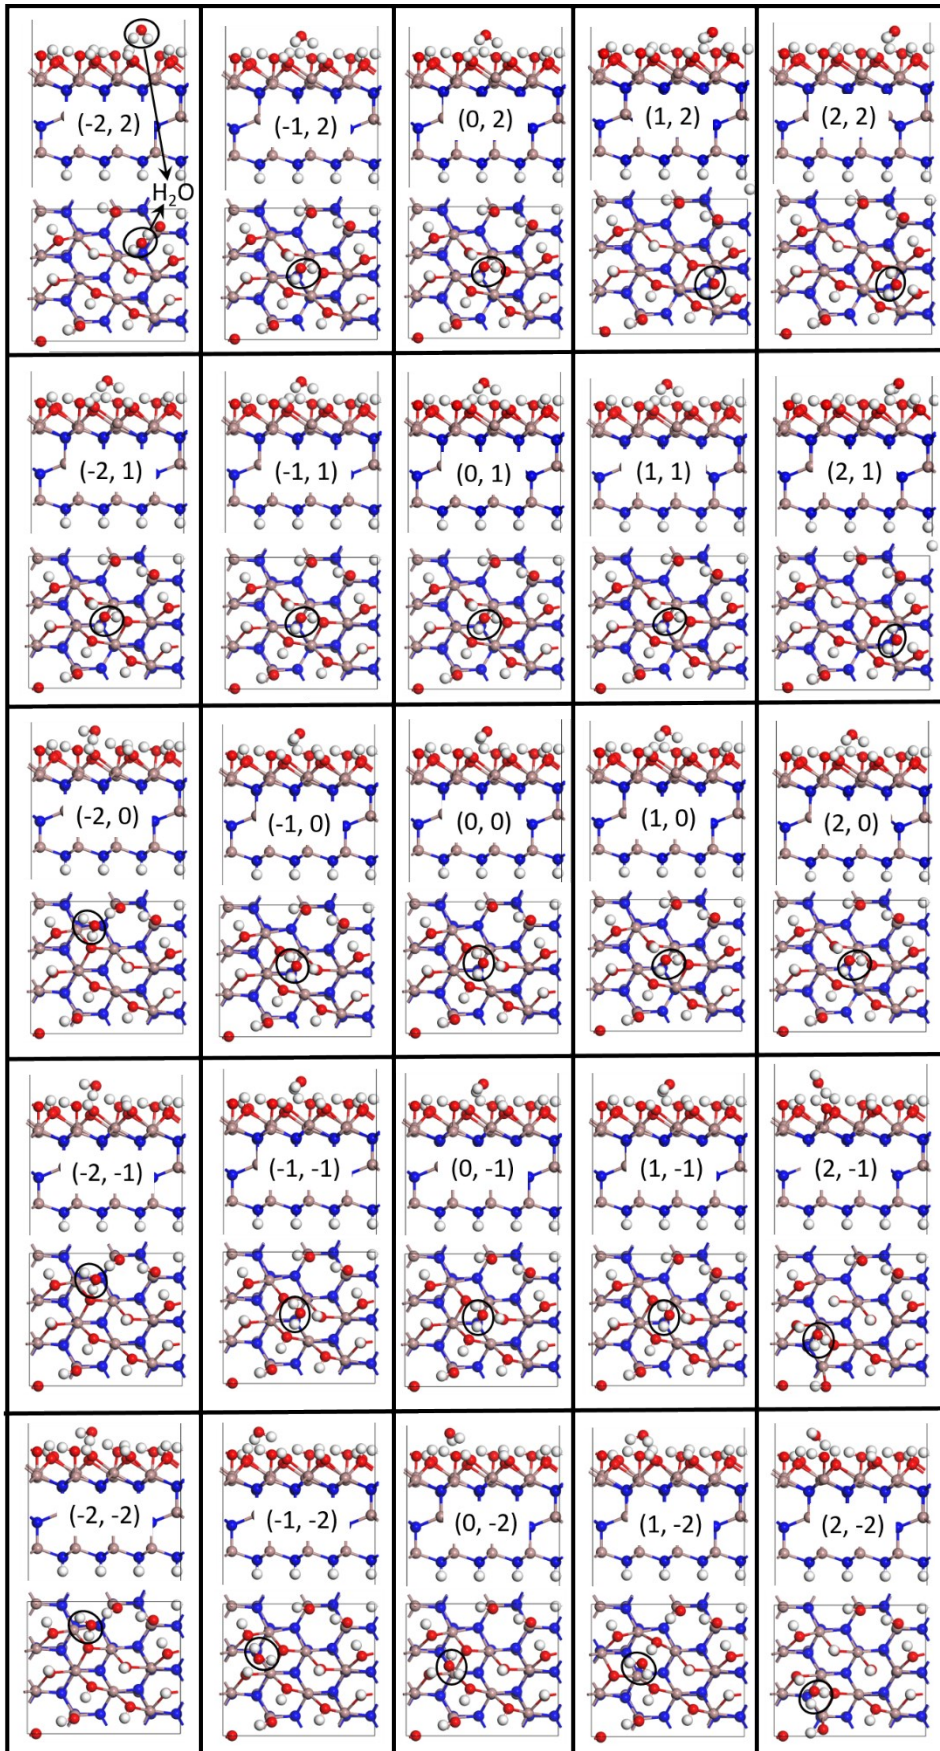

**Figure S1.** Post-optimized structure of GaN substrate structures of GaN substrate with 25 different initial positions of OH radical. The model of GaN substrate is the same as that in Figure 8 of manuscript, while the  $x$ - and  $y$ -positions of the OH radical are varied. In details, the positions of OH radical in Figure 8 is set as a datum point, and  $(i, j)$  indicates that the OH radical is moved with  $i$  Å along  $x$ -direction and  $j$  Å along  $y$ -direction from the datum point. For all calculations, front view and top view are given.
